# Supplementary material for: Endogenous Viral Elements in Ixodid Tick Genomes
Source: MDPI journal article supplement (doi:10.3390/v15112201), 2023-10-31

- dsDNA

Caudovirales

Lefavirales

Orthopoliintovirales
- ssDNA
- Piccovirales

dsRNA

Dunvirales

Ghabrivirales

(+)ssRNA

Amarillovirales

(-)ssRNA

Articulavirales

Bunyvirales

Jingchvirales

Mononegavirales

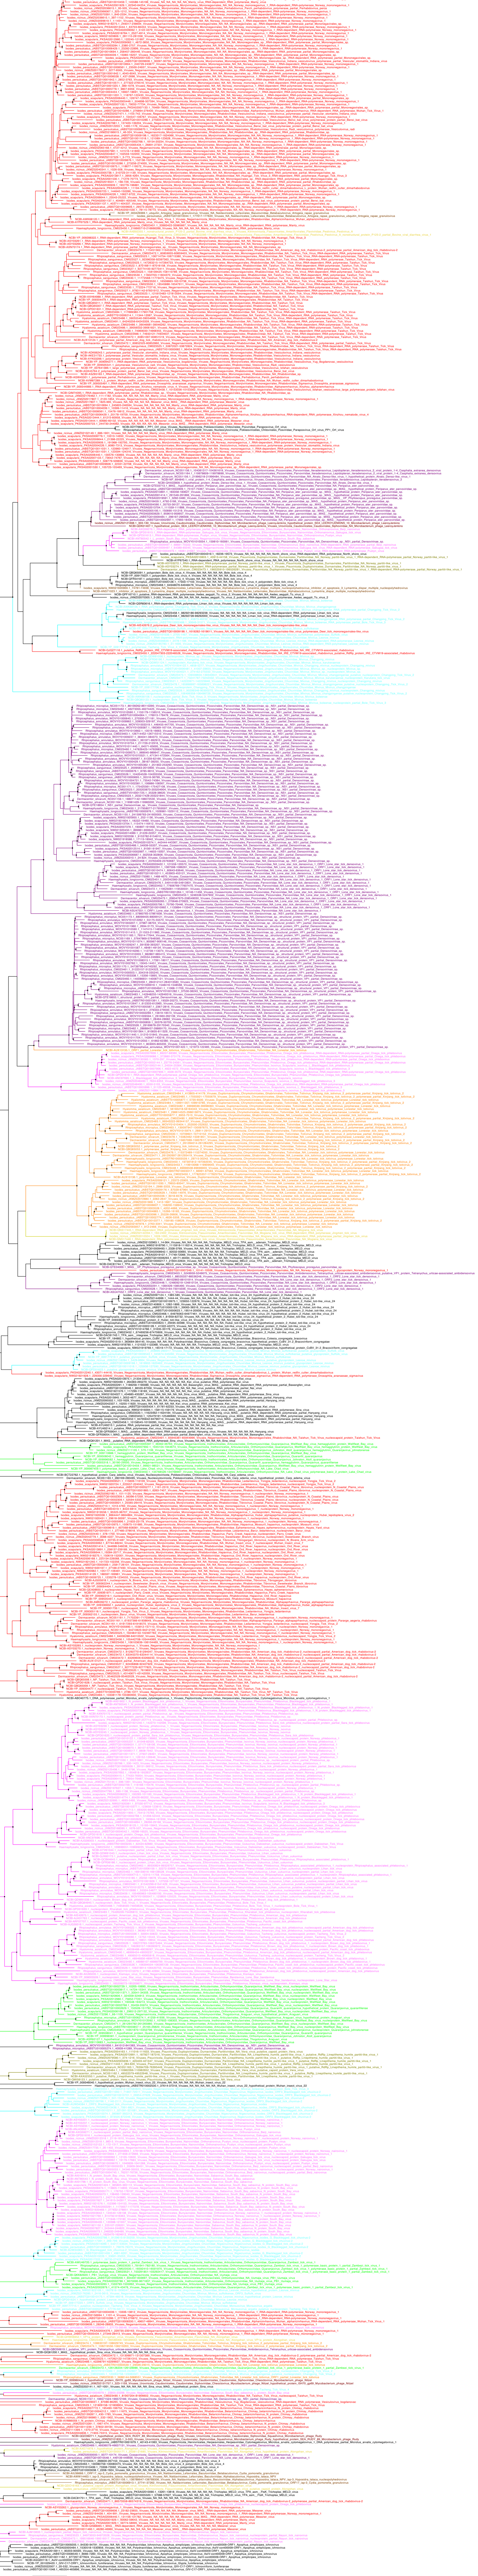

Supplement: s1 [file s1]
