# Supplementary figures and images for: Endogenous Viral Elements in Ixodid Tick Genomes
Source: MDPI journal article supplement (doi:10.3390/v15112201), 2023-10-31

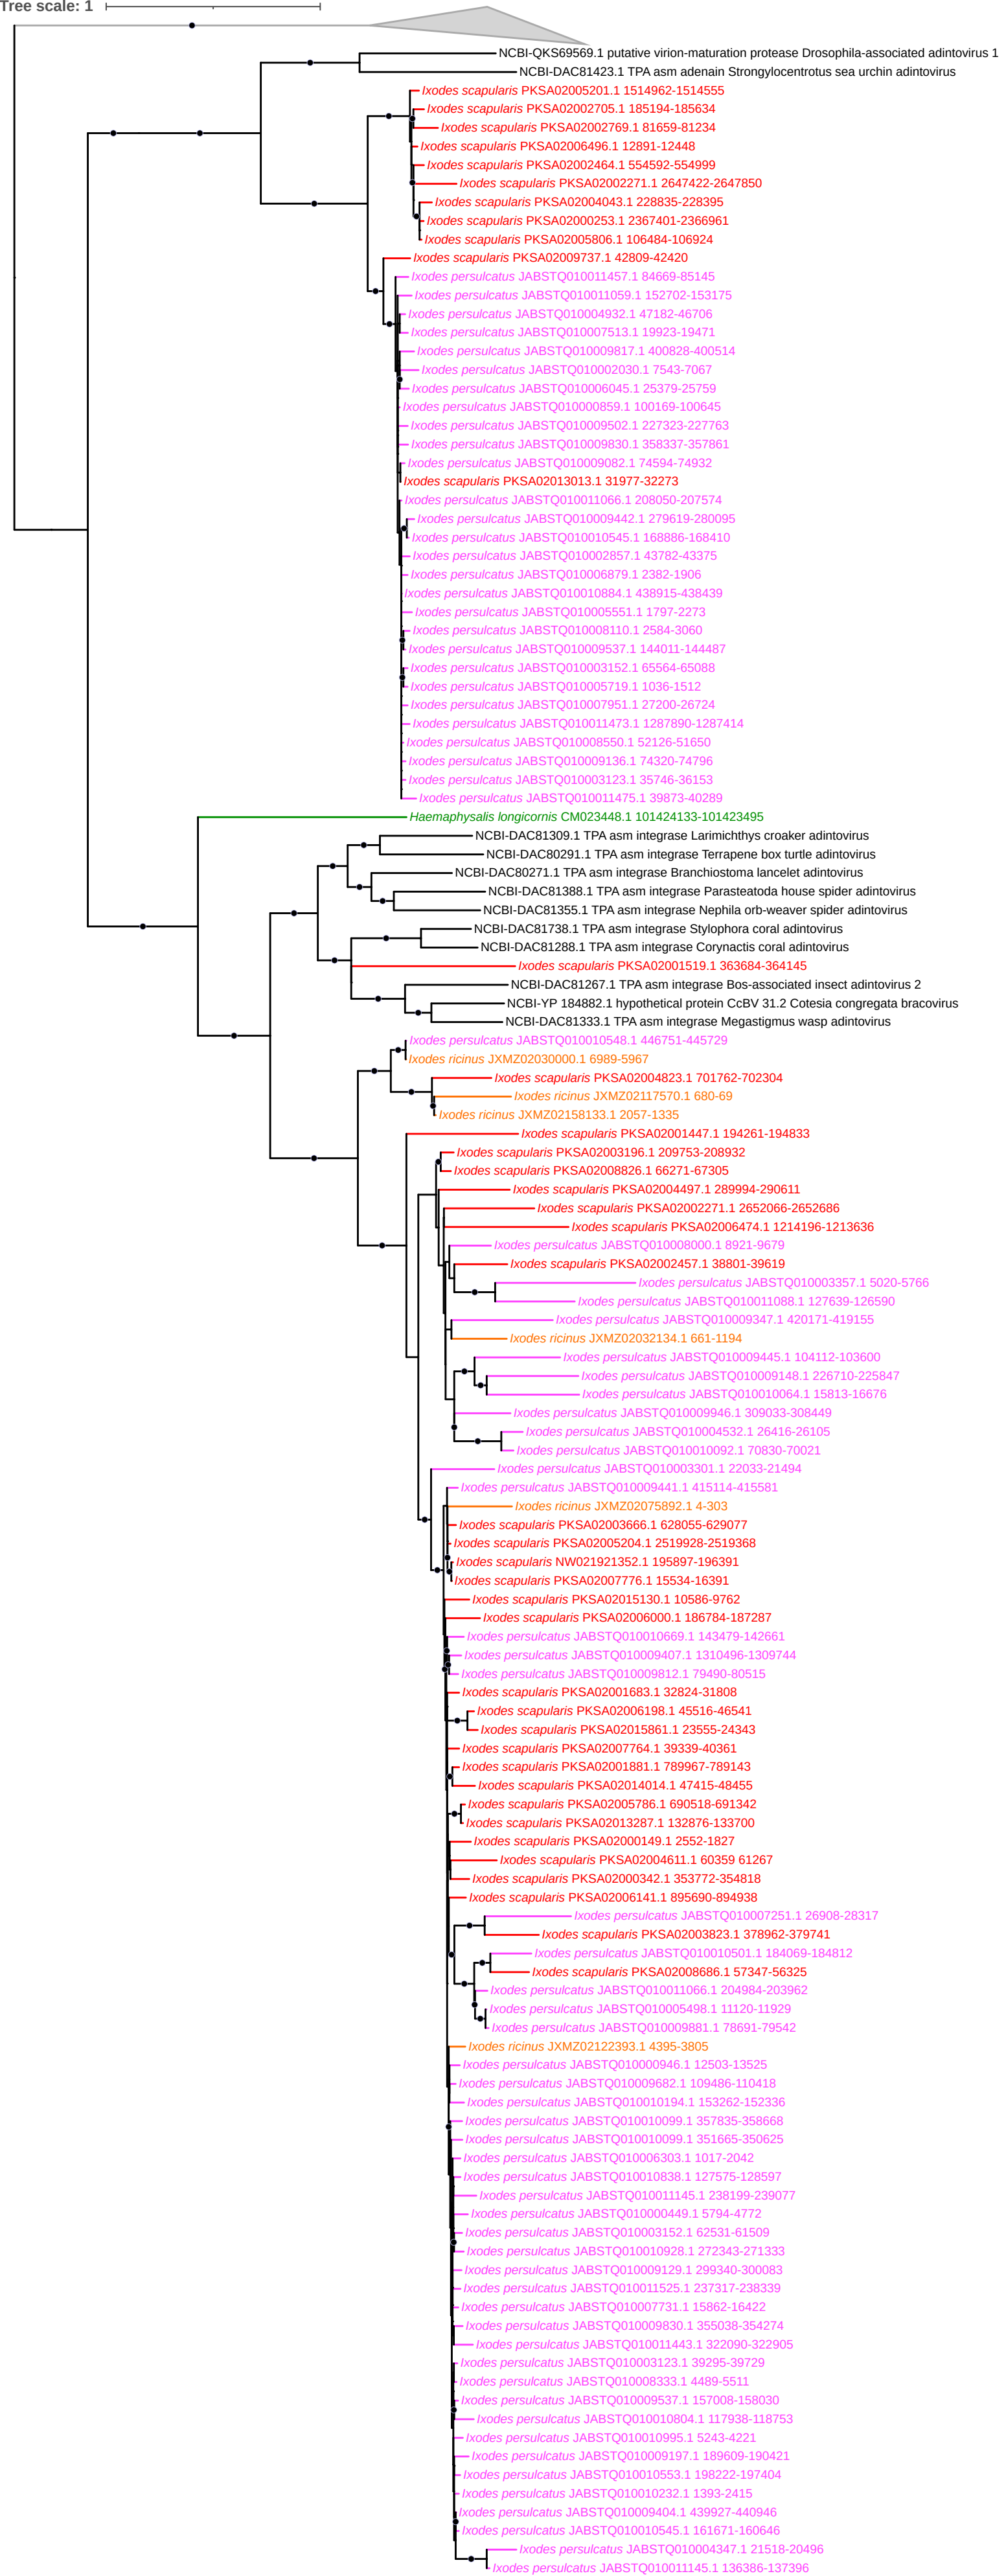

Supplement: s1 [file s1]

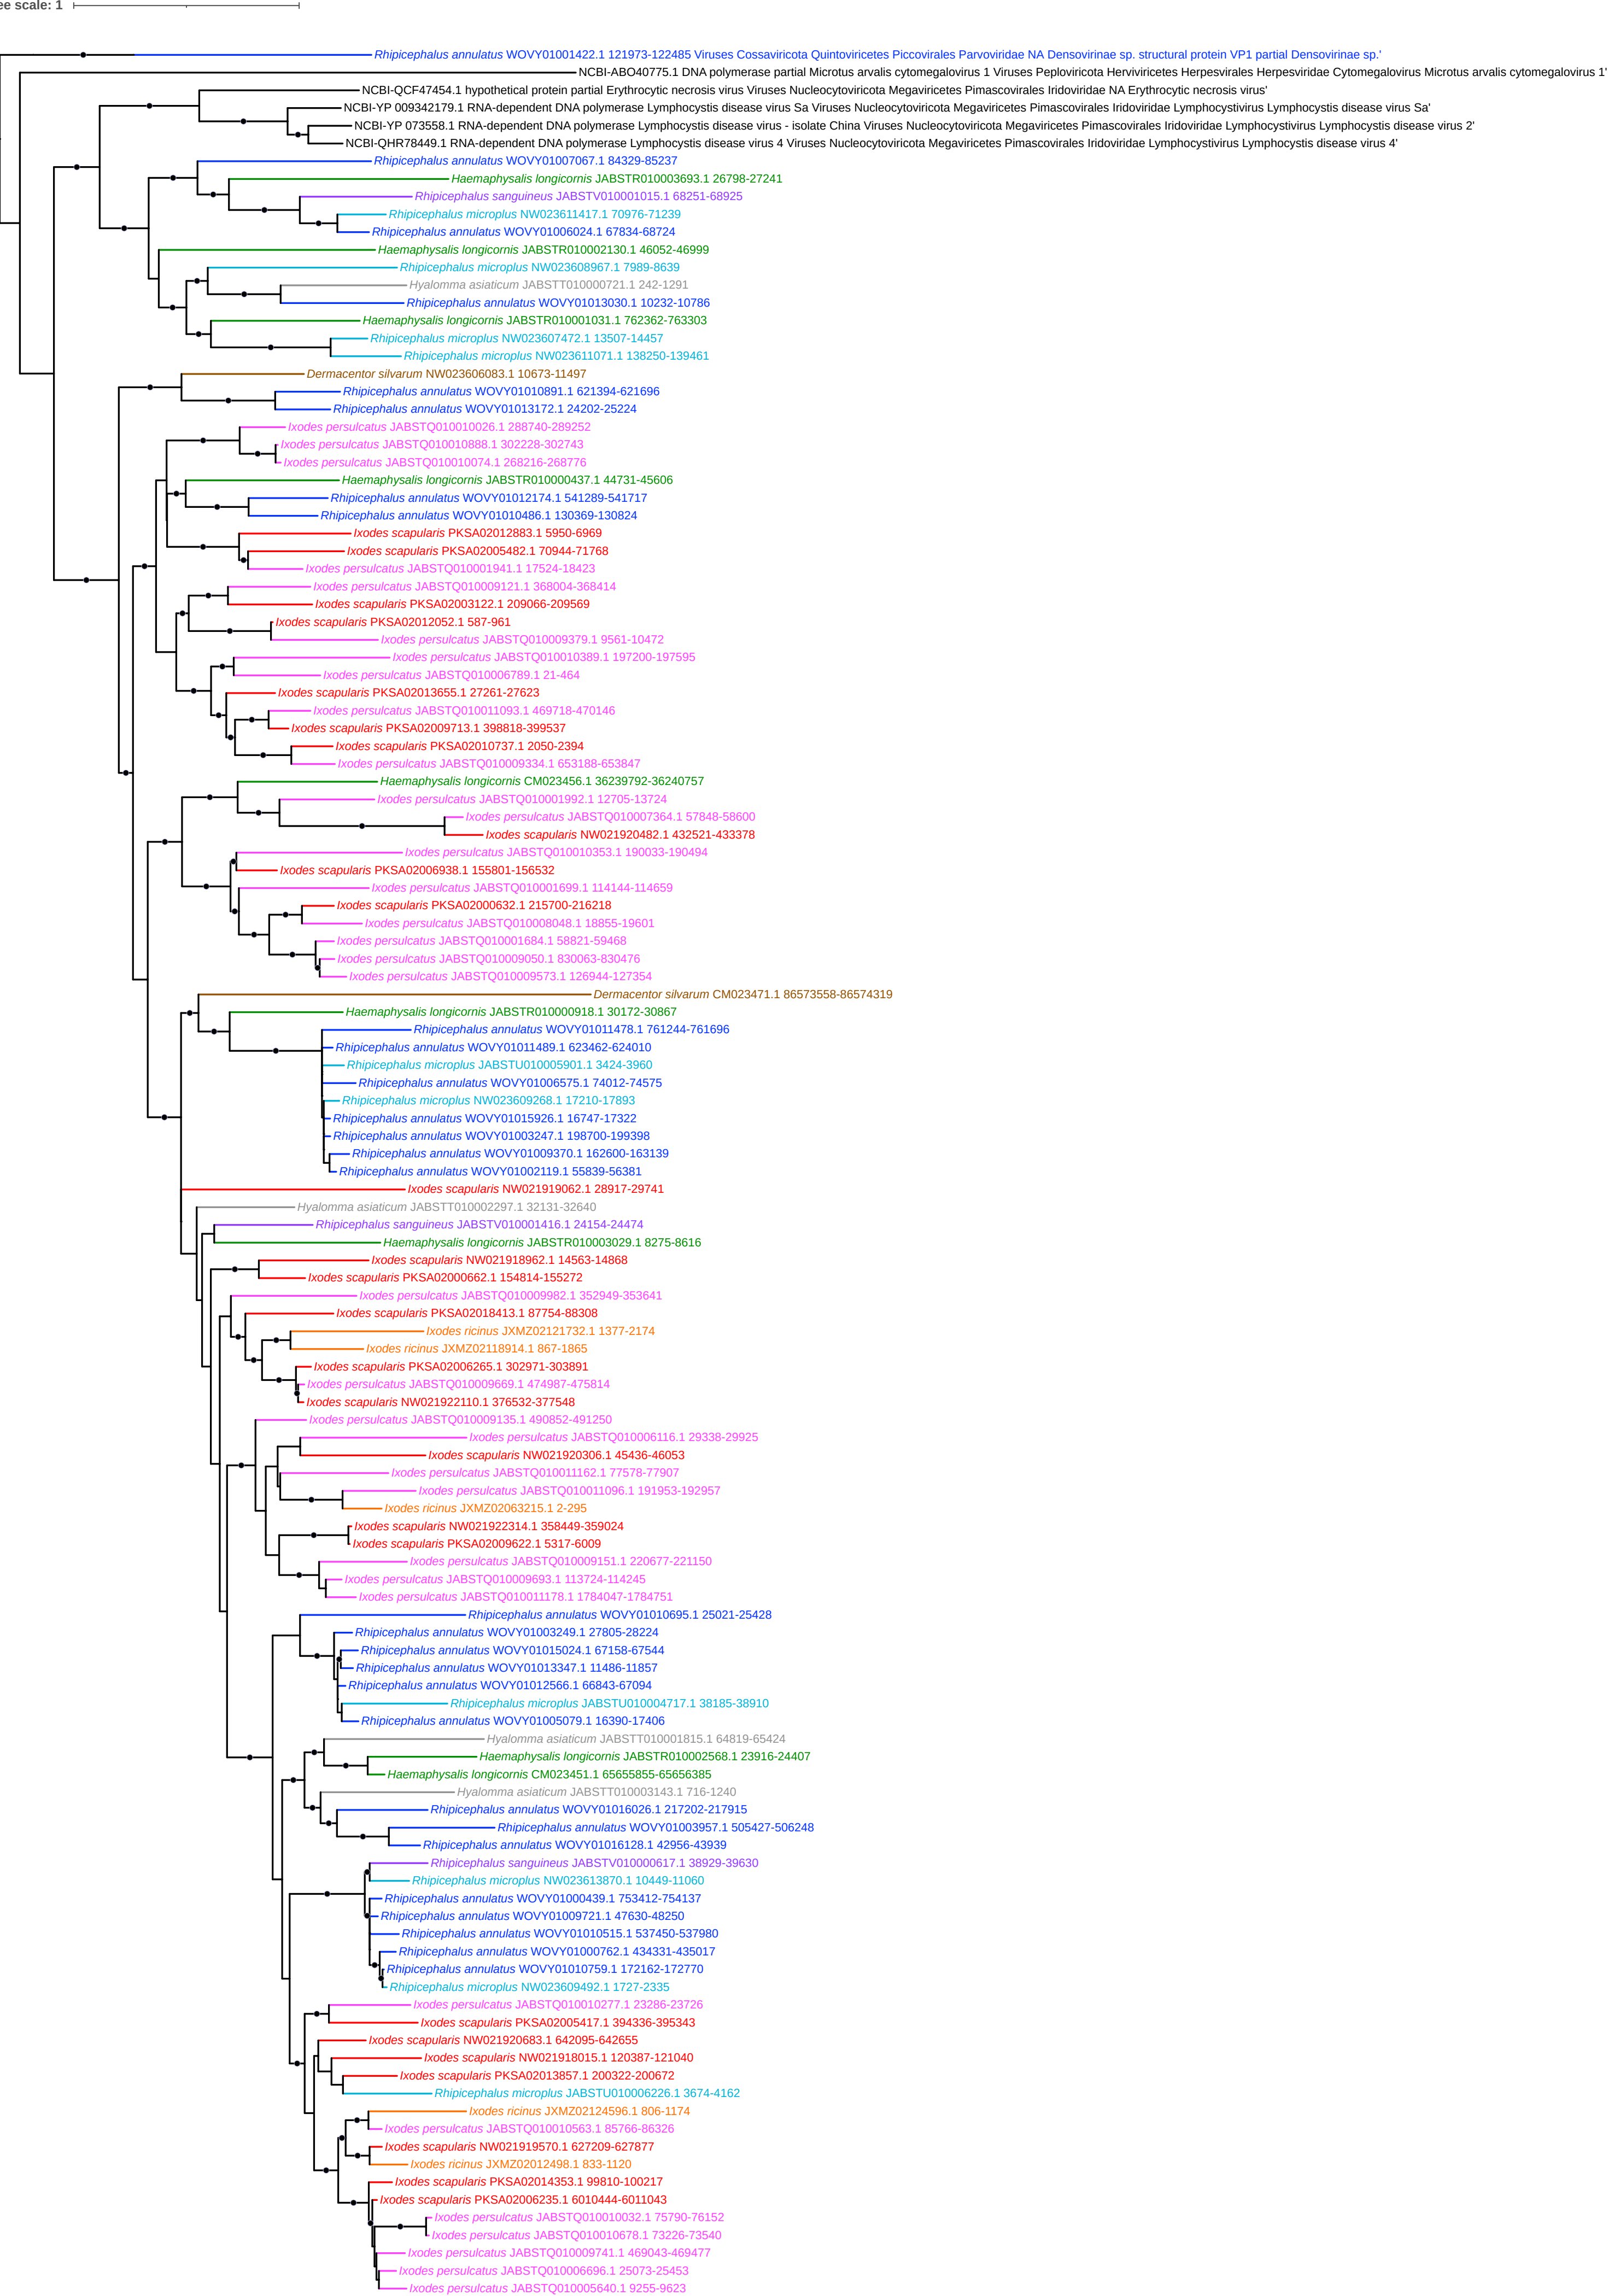

Supplement: s1 [file s1]
